# Supplementary material for: High-Purity Corundum as Support for Affinity Extractions from Complex Samples
Source: MDPI journal article supplement (doi:10.3390/separations9090252), 2022-09-07
Supplement: s1 [file s1]

Supplementary materials

# High-purity corundum as support for affinity extractions from complex samples

Jule L. Völzke, Parya Hodjat Shamami, Kornelia Gawlitza, Ines Feldmann, Annett Zimathies, Klas Meyer and Michael G. Weller\*

Federal Institute for Materials Research and Testing (BAM), Richard-Willstätter-Strasse 11, 12489 Berlin, Germany

\* Correspondence: michael.weller@bam.de; Tel.: +49-30-8104-1150

## DLS measurements of corundum powder F1200

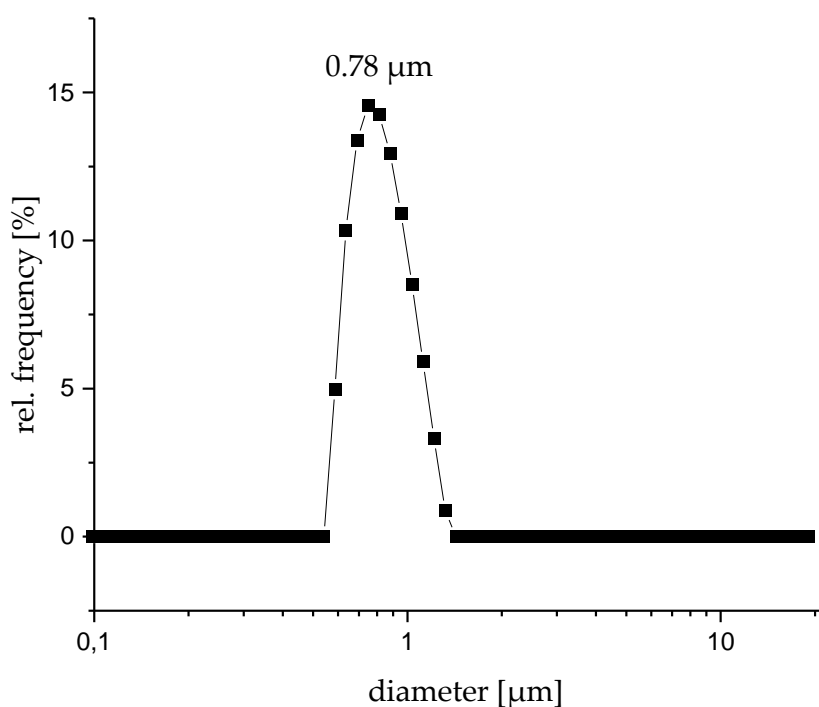

**Figure S1.** Dynamic light scattering (DLS) measurements of corundum F1200 in 0.1 M PBS indicated an average particle size of 0.78 μm.

### Purification of corundum

A scanning transmission electron microscope measurement combined with an energy-dispersive X-ray spectroscopy (EDX) analysis revealed that impurities of sodium and chlorine-containing needle-shaped crystal structures were detected covering the corundum surface (Figure S2). A purification protocol was established to eliminate these impurities and form a clean corundum surface (Figure S3). BET- measurements, before the purification protocol was performed, indicated a corundum surface of  $5.2 \text{ m}^2/\text{g}$ , whereas, after the purification, the surface decreased to  $4.5 \text{ m}^2/\text{g}$  (Figure S4). This decrease in surface area was to be expected since the needle-shaped structures had been removed completely.

### TEM micrographs of unpurified and purified corundum

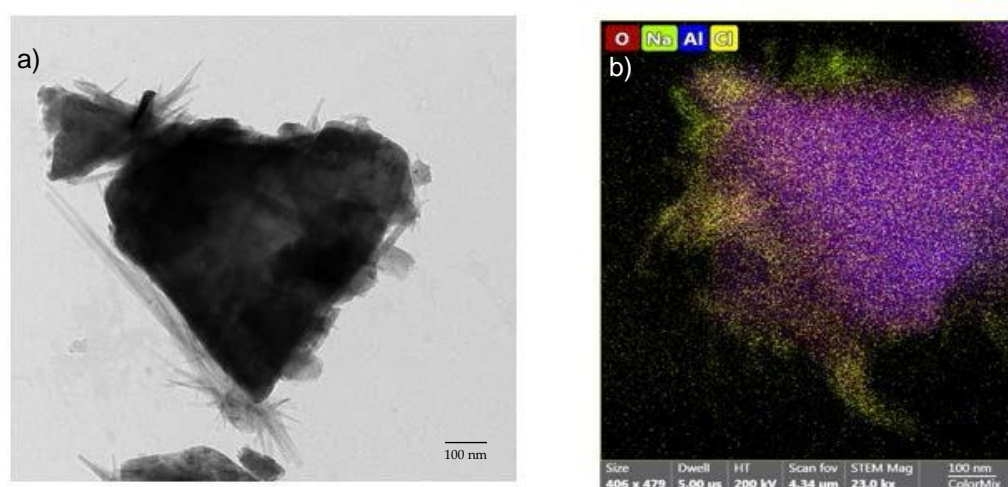

**Figure S2.** TEM micrograph of unpurified corundum. a) Corundum surface covered with needle-shaped crystals. b) Elemental mapping showing sodium- and chloride-containing structures.

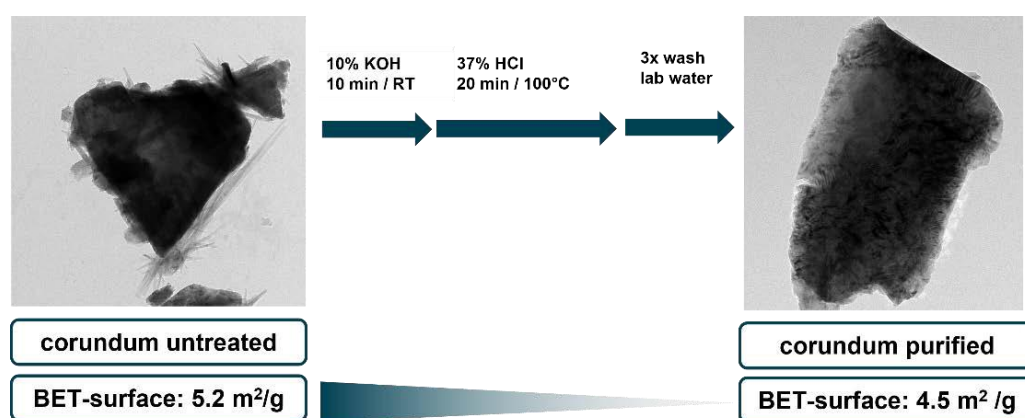

**Figure S3.** Purification protocol for corundum powder.

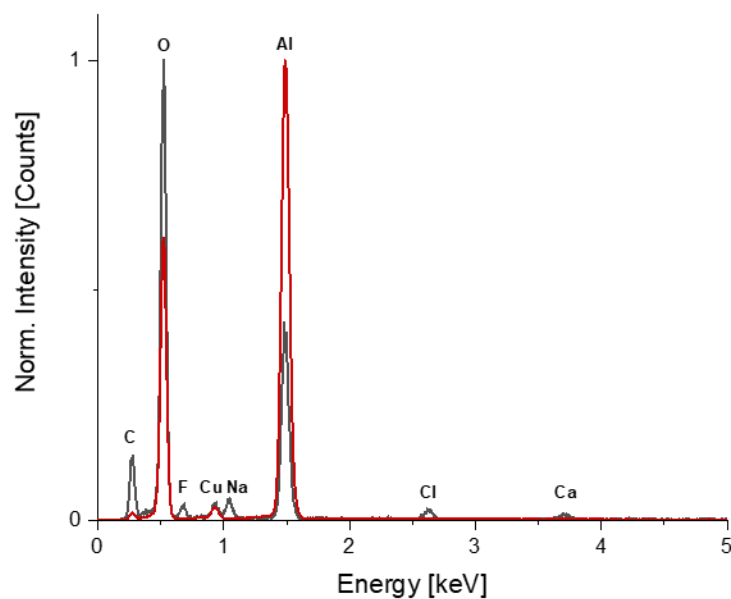

**Figure S4.** TEM-EDS analysis of corundum before (black) and after (red) purification.

### BET plots

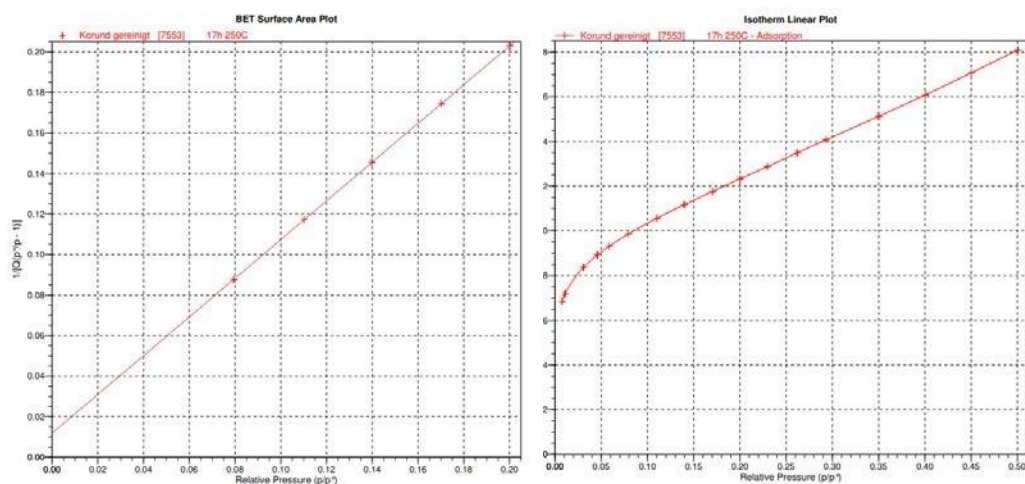

**Figure S5.** BET measurements. Isotherm linear plot and BET surface area plot.

### HPLC - Calibration of tyrosine

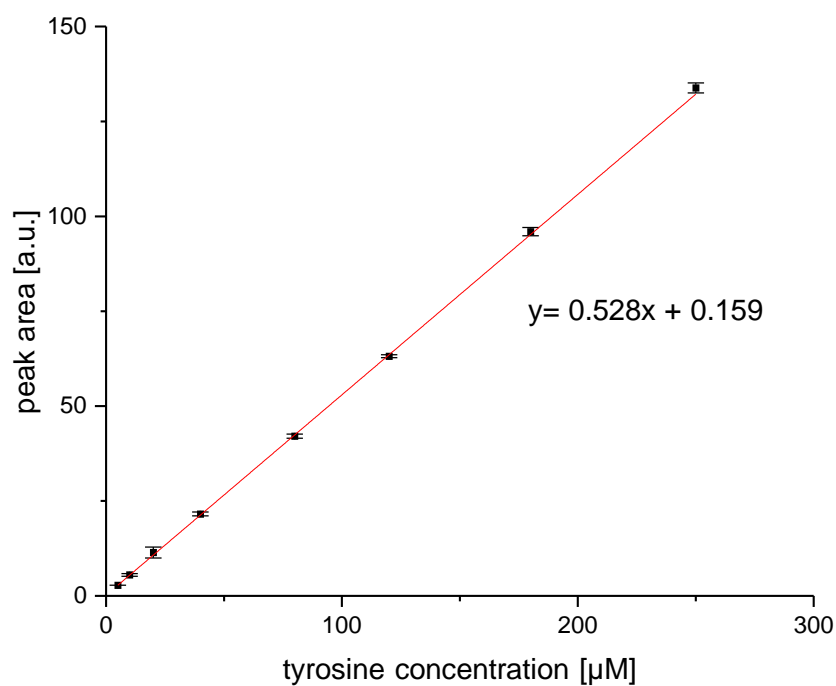

**Figure S6.** Calibration line of tyrosine (amino acid standard solution). Fluorescence detection was performed at 272 nm (Ex.) and 303 nm (Em.).

### TEM-EDS of 12-APA functionalized corundum

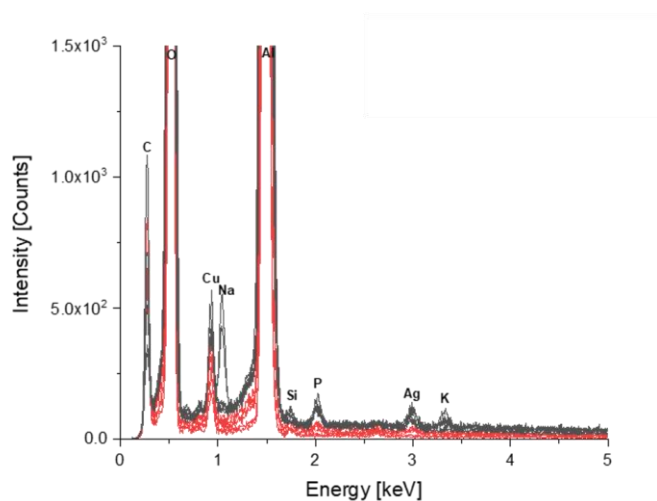

**Figure S7.** TEM-EDS analysis of corundum before (red) and after (black) 12-APA functionalization.

### $^1\text{H}$ NMR of polyglycerol vs. oxidized polyglycerol

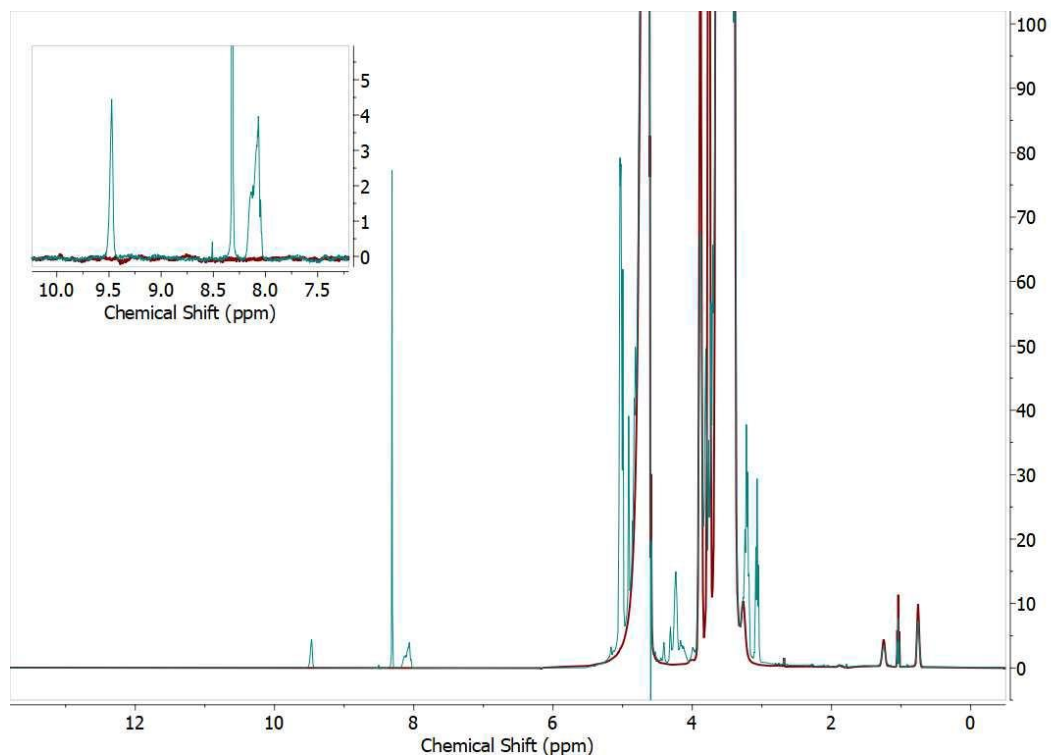

**Figure S8.**  $^1\text{H}$  NMR of untreated polyglycerol (PG, red line) and oxidized PG (blue line). The NMR signal at a chemical shift at around 9.5 ppm indicates a terminal aldehyde of the polyglycerol that was formed due to the oxidative cleavage with  $\text{NaIO}_4$ . The very sharp singlet at a chemical shift of about 8.3 ppm corresponds to formic acid, also a product of the cleavage.

### ESEM micrographs of functionalized corundum

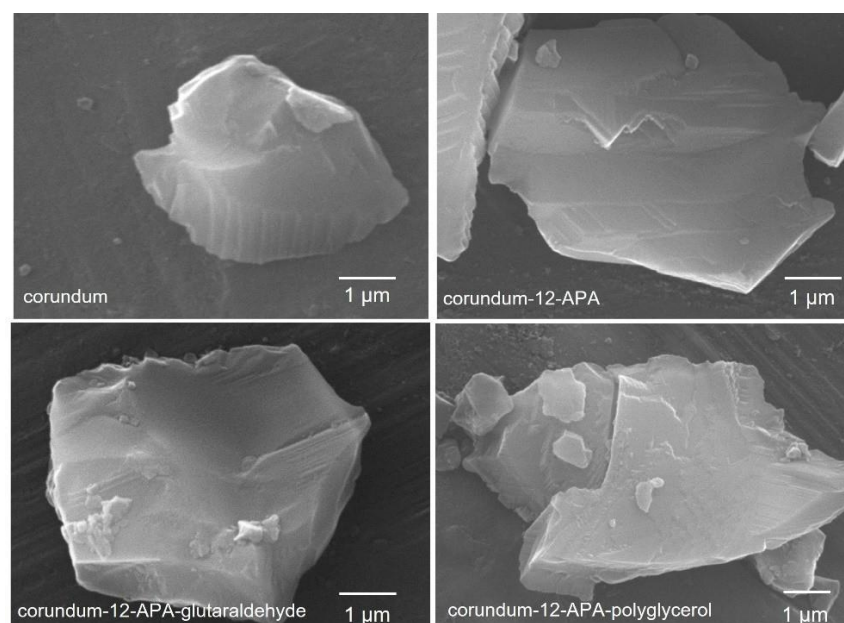

**Figure S9.** ESEM micrographs of functionalized corundum. A surface layer was not visible.

## Evaluation of non-specific binding (NSB)

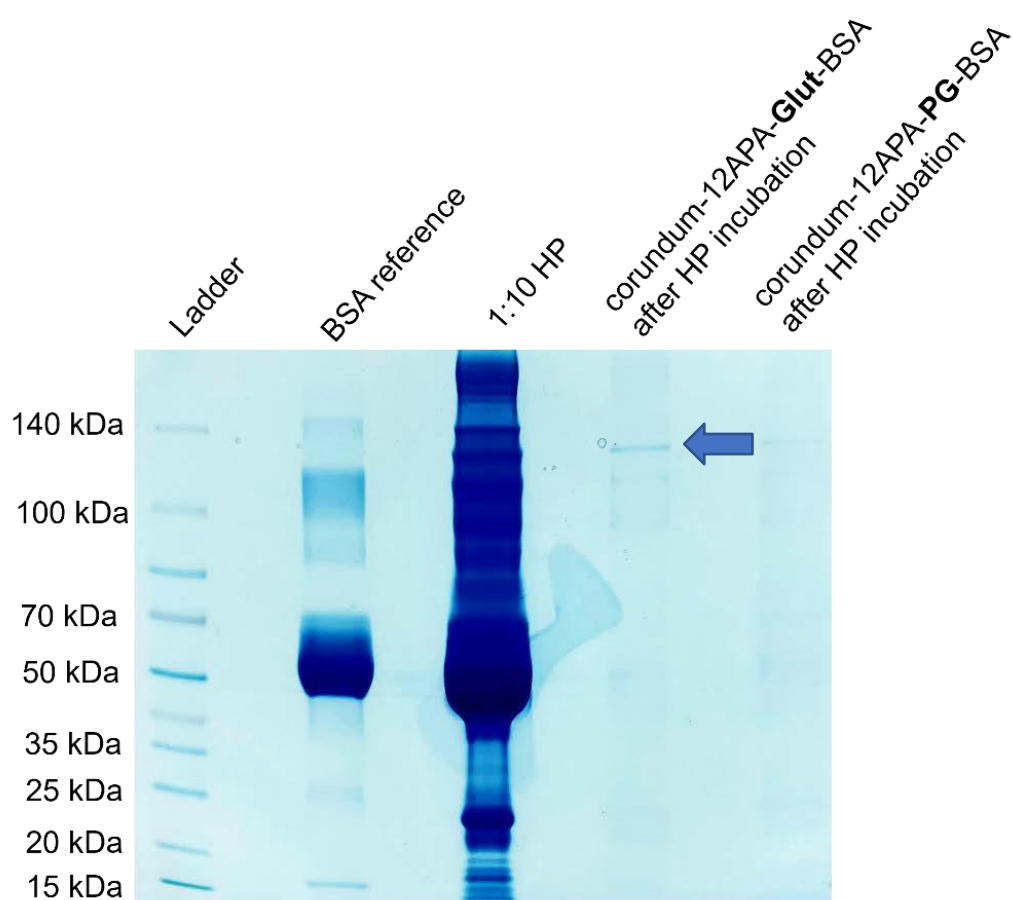

**Figure S10.** SDS-PAGE of corundum functionalized with bovine serum albumin (BSA), conjugated with glutaraldehyde or polyglycerol. The functionalized corundum was incubated with 1:10 diluted human plasma (HP). After the elution with 2% of SDS, almost no protein elution was detected for the polyglycerol/BSA functionalized corundum, whereas for the glutaraldehyde/BSA at least one weak protein band (arrow) is visible. Furthermore, no elution (leaching) of the covalently bound BSA was observed.
